# Supplementary material for: Porosity of Solid Electrolyte Interphases on Alkali Metal Electrodes with Liquid Electrolytes
Source: PubMed Central journal article supplement (PMC8569679; doi:10.1021/acsami.1c15607), 2021-10-20
Supplement: am1c15607_si_001.pdf [file am1c15607_si_001.pdf]

# Supporting information

## Porosity of solid electrolyte interphases on alkali metal electrodes with liquid electrolytes

Kyungmi Lim, Bernhard Fenk, Jelena Popovic\*, Joachim Maier

Max Planck Institute for Solid State Research, Stuttgart, Baden-Württemberg, Germany

### Table of contents

- I. EIS results of symmetric Li/Na cells and symmetric stainless steel cell with pure glyme solvents
- II. ICP-OES results of pure triglyme solvent contacted with Li/Na
- III. EIS results of Li/Na symmetric cells with pure carbonate solvent
- IV. Activation energy ( $E_a$ ) of ion transport in bulk electrolytes
- V. Time-dependent  $E_a$  of Li-carbonate and Na-carbonate systems
- VI. FIB-SEM images of SEIs on Li and Na contacted with carbonate-based electrolyte for 2 hours and 600 hours
- VII. ToF-SIMS results of SEIs on Li and Na contacted with glyme-/carbonated-based electrolytes after 600 hours of storage under open-circuit condition
- VIII. XPS results of SEIs on Li contacted with glyme-/carbonate-based electrolytes
- IX. Determination of cation transference number ( $t_{Li/Na}$ ) and salt diffusion coefficient ( $D_{salt}$ ) by galvanostatic polarization method
- X.  $t_{Na}$  determination by Sørensen and Jacobsen method
- XI. Top-view SEM images of Li/Na electrodes after stripping/plating with glyme-/carbonate-based electrolyte stored for 0 hour vs. 600 hours
- XII. Comparison of Pilling-Bedworth ratio ( $R_{PB}$ ) of Li SEI compounds vs. Na SEI compounds

## I. EIS results of symmetric Li/Na cells and symmetric stainless steel cell with pure glyme solvents

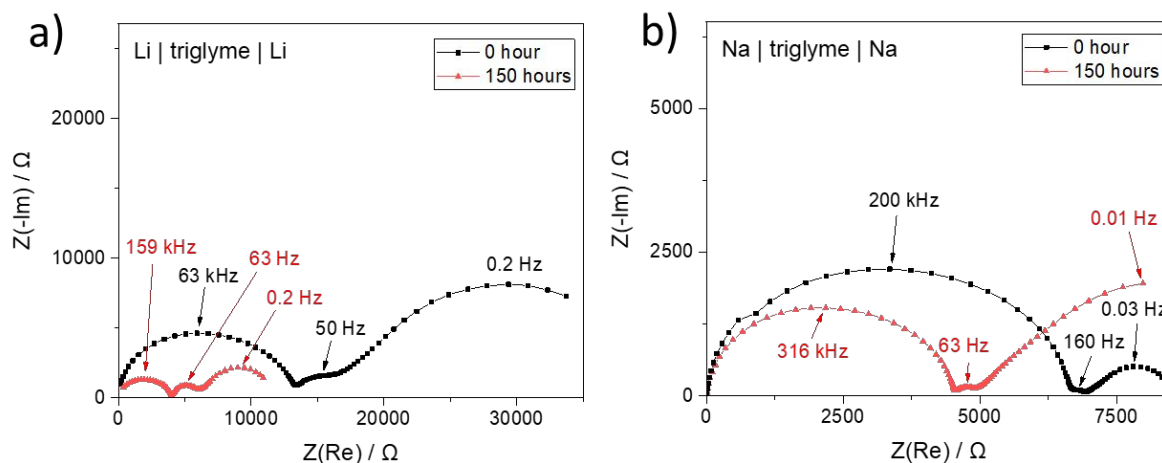

**Figure S1.** Nyquist plots of Li (a) and Na (b) symmetric cell in contact with pure triglyme solvent and their evolution over time.

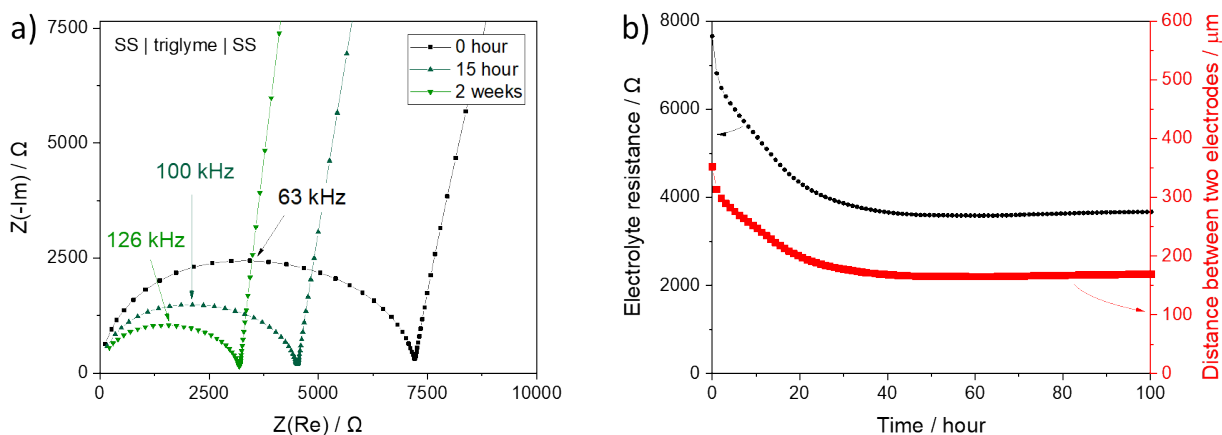

**Figure S2.** (a) Nyquist plots of stainless steel | triglyme | stainless steel symmetric cell. (b) Resistance and corresponding distance between two electrodes over time. The distance between two electrodes was derived by  $L = \sigma RA$  ( $L$ : distance,  $\sigma$ : ionic conductivity of triglyme,  $R$ : resistance measured in (a),  $A$ : surface area of the electrode)

## II. ICP-OES results of pure triglyme solvent contacted with Li/Na

Inductively coupled plasma optical emission spectroscopy (ICP-OES) was done with Spectro Ciros device. Liquid samples were diluted in water in a ratio of 1:1000.

**Table S1.** Concentration of Li and Na measured by ICP-OES. For sample 2 and 3, pure triglyme was contacted with Li/Na metal for 150 hours. (Unit: mmol L<sup>-1</sup>)

| Sample                                 | Li                    | Na                    |
|----------------------------------------|-----------------------|-----------------------|
| 1) Pure triglyme                       | --                    | 6.09×10 <sup>-4</sup> |
| 2) Pure triglyme contacted to Li metal | 14.9                  | 3.48×10 <sup>-4</sup> |
| 3) Pure triglyme contacted to Na metal | 2.88×10 <sup>-4</sup> | 16.8                  |

### III. EIS results of Li/Na symmetric cells with pure carbonate solvent

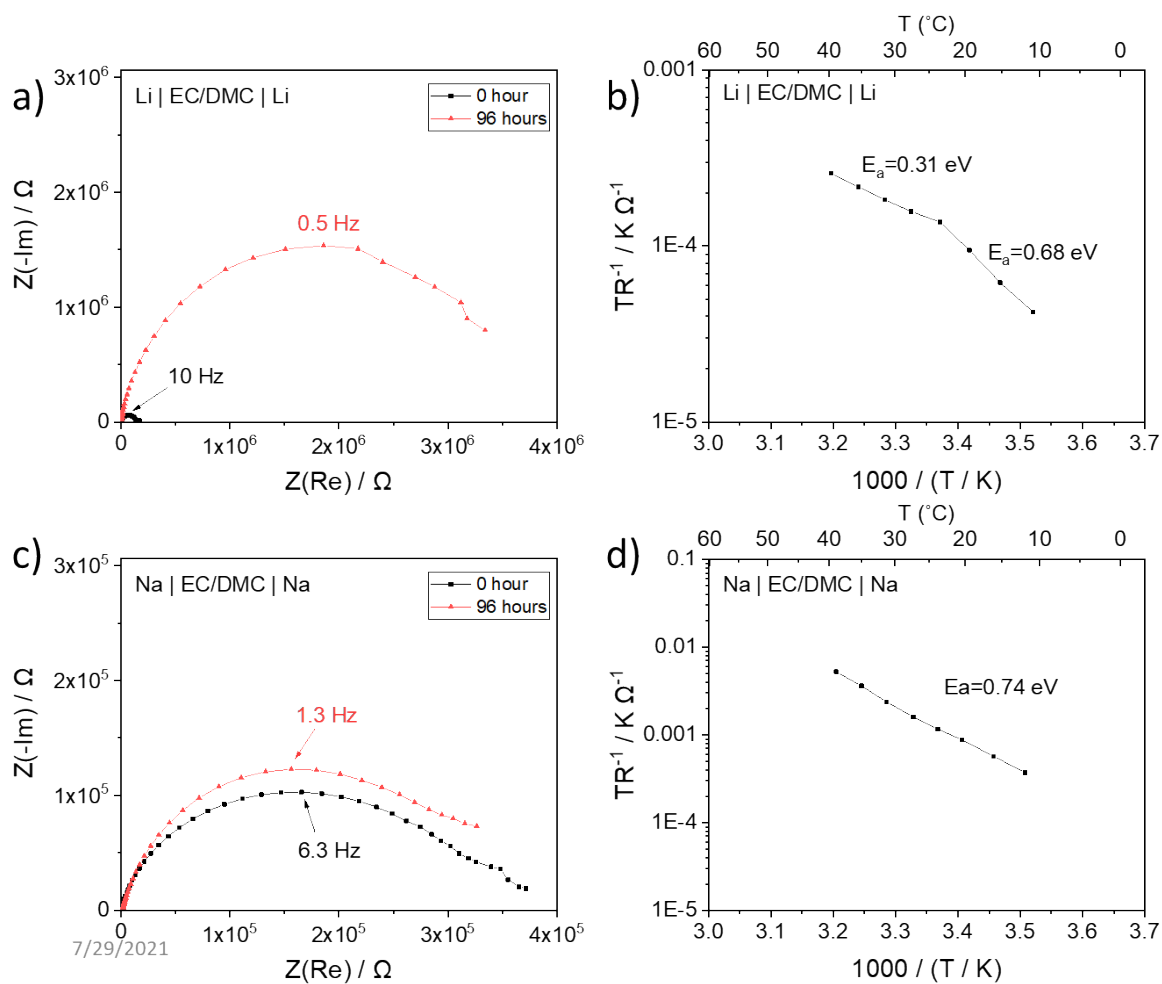

**Figure S3.** EIS investigation of Li/Na symmetric cells containing EC/DMC=50/50 (v/v) without salts. (a, c) Nyquist plots with characteristic frequency responses in Li, Na-carbonate system, respectively. (b, d) Arrhenius plots and  $E_a$  corresponding to (a, c).

#### IV. Activation energy ( $E_a$ ) of ion transport in bulk electrolytes

For EIS measurement of liquid electrolytes with fixed electrode distance at room temperature, self-made vessel was used. The vessel consists of two electrodes made of gold-coated brass and a Teflon ring for adjustment of the electrode distance.

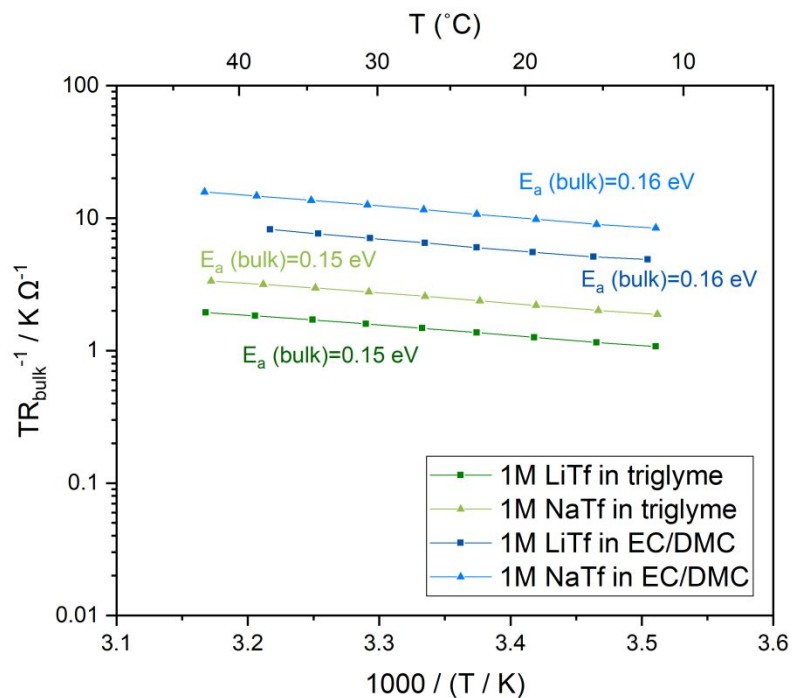

**Figure S4.** Temperature dependency of bulk electrolyte resistance and activation energy in four different electrolytes.

## V. Time-dependent $E_a$ of Li-carbonate and Na-carbonate systems

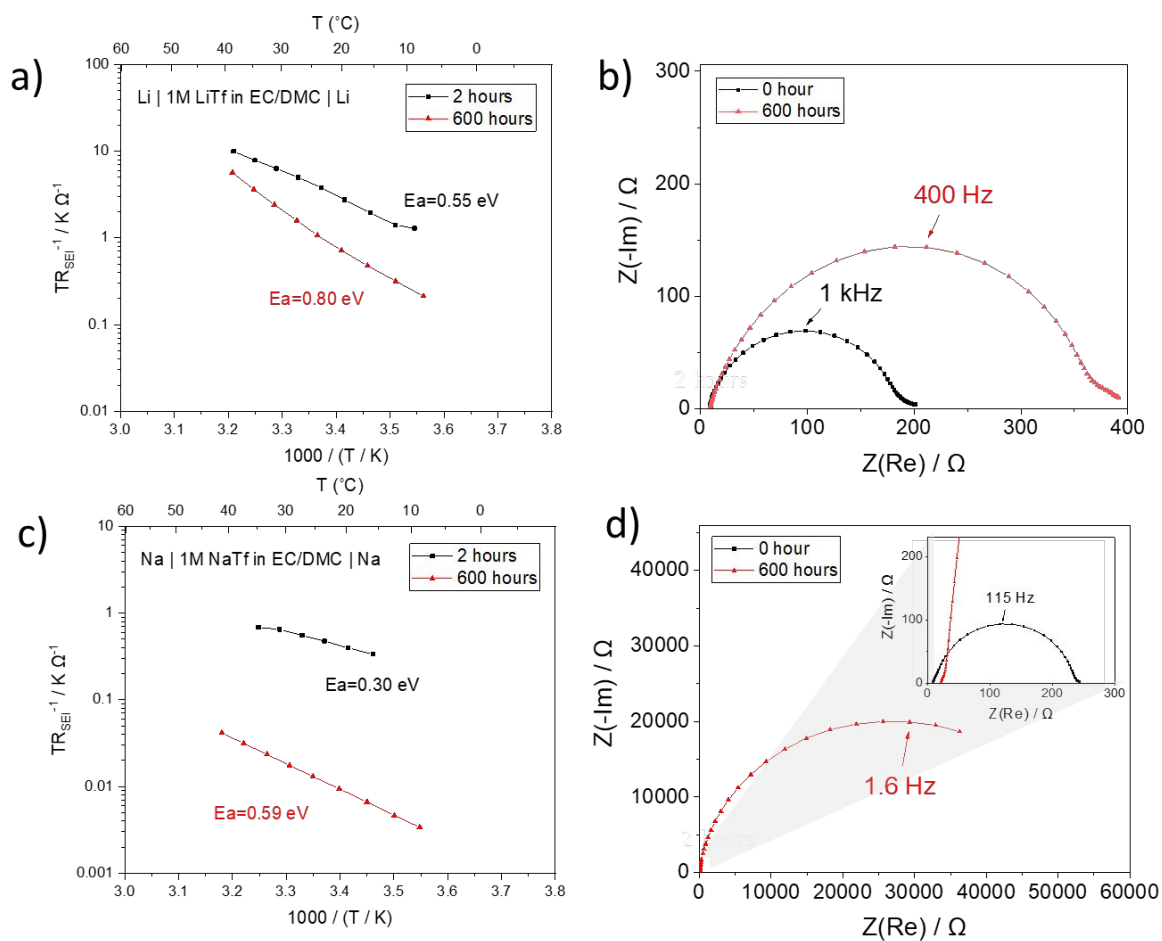

**Figure S5.** The evaluation of the changes in the activation energy of ion transport through SEIs. (a, c) Arrhenius plot of Li(Na)-carbonate system (symmetric Li or Na electrodes with 1M LiTf or NaTf in EC/DMC) stored under open-circuit condition for 2 hours and 600 hours. (b, d) show impedance spectra at room temperature before storage (0 hour) and after storage (600 hours) in Li-carbonate and Na-carbonate system, respectively.

**VI. FIB-SEM images of SEIs on Li and Na contacted with carbonate-based electrolyte for 2 hours and 600 hours**

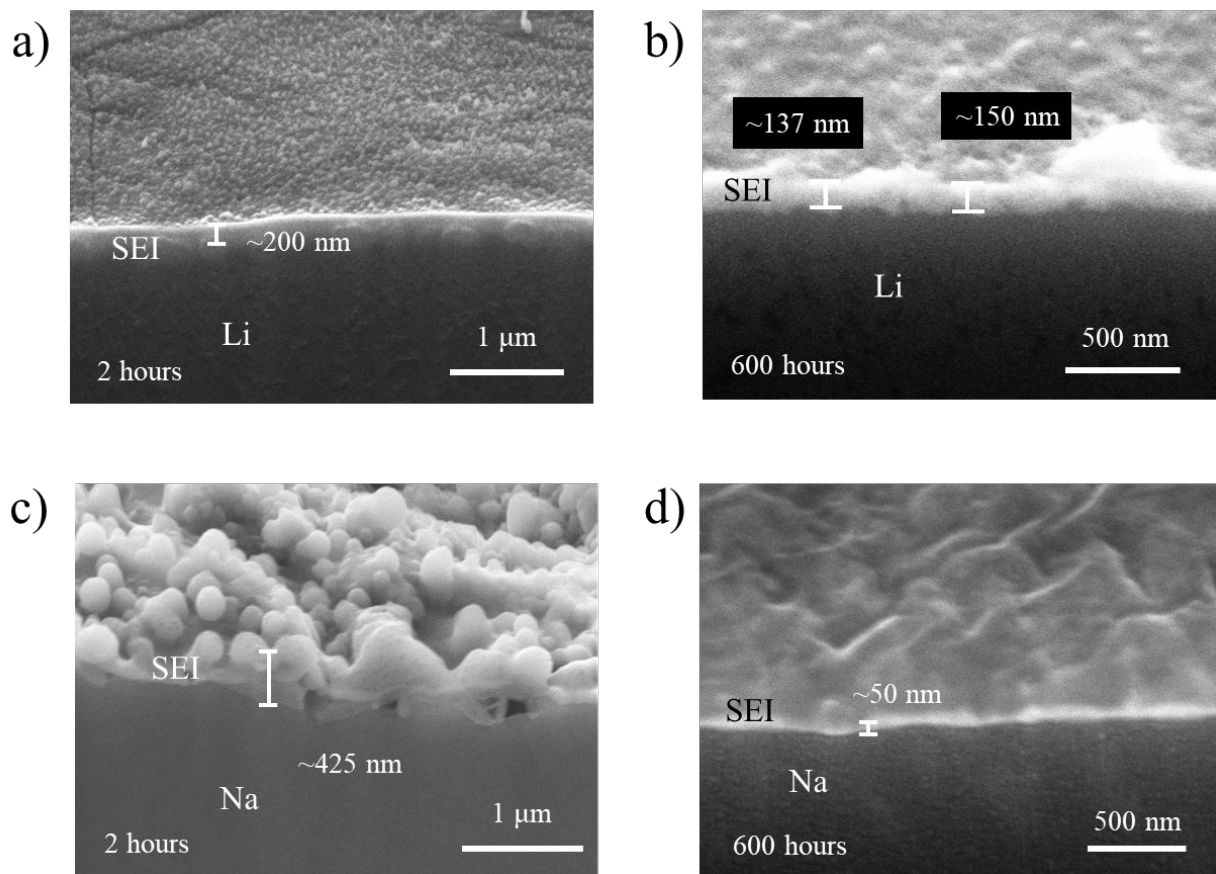

**Figure S6.** Cross-section images of SEIs on Li and Na measured by FIB-SEM. SEIs are formed by the contact between Li and carbonate-based electrolyte (1M LiTf in EC/DMC) and stored for (a) 2 hours and (b) 600 hours. Similarly, SEIs on Na are formed by the contact between Na and carbonate-based electrolyte (1M NaTf in EC/DMC) and stored for (c) 2 hours and (d) 600 hours.

## VII. ToF-SIMS results of SEIs on Li and Na contacted with glyme-/carbonate-based electrolytes after 600 hours of storage under open-circuit condition

Sample preparation was done in the same manner as in the FIB-SEM analyses. ToF-SIMS measurements were carried out using mass spectrometer ToF-SIMS-CNS (IONTOF). Firstly, samples were sputtered with Cs-source sputter gun operated with an acceleration energy of 0.5 keV with current of 124~152 nA in the area of  $300 \times 300 \mu\text{m}^2$ . For analysis, Bi-source gun accelerated with the voltage of 30 kV and the beam current of 0.66 pA was used in the area of  $50 \times 50 \mu\text{m}^2$ . Analysis of ToF-SIMS data was done with software Surfacedlab 7.1.

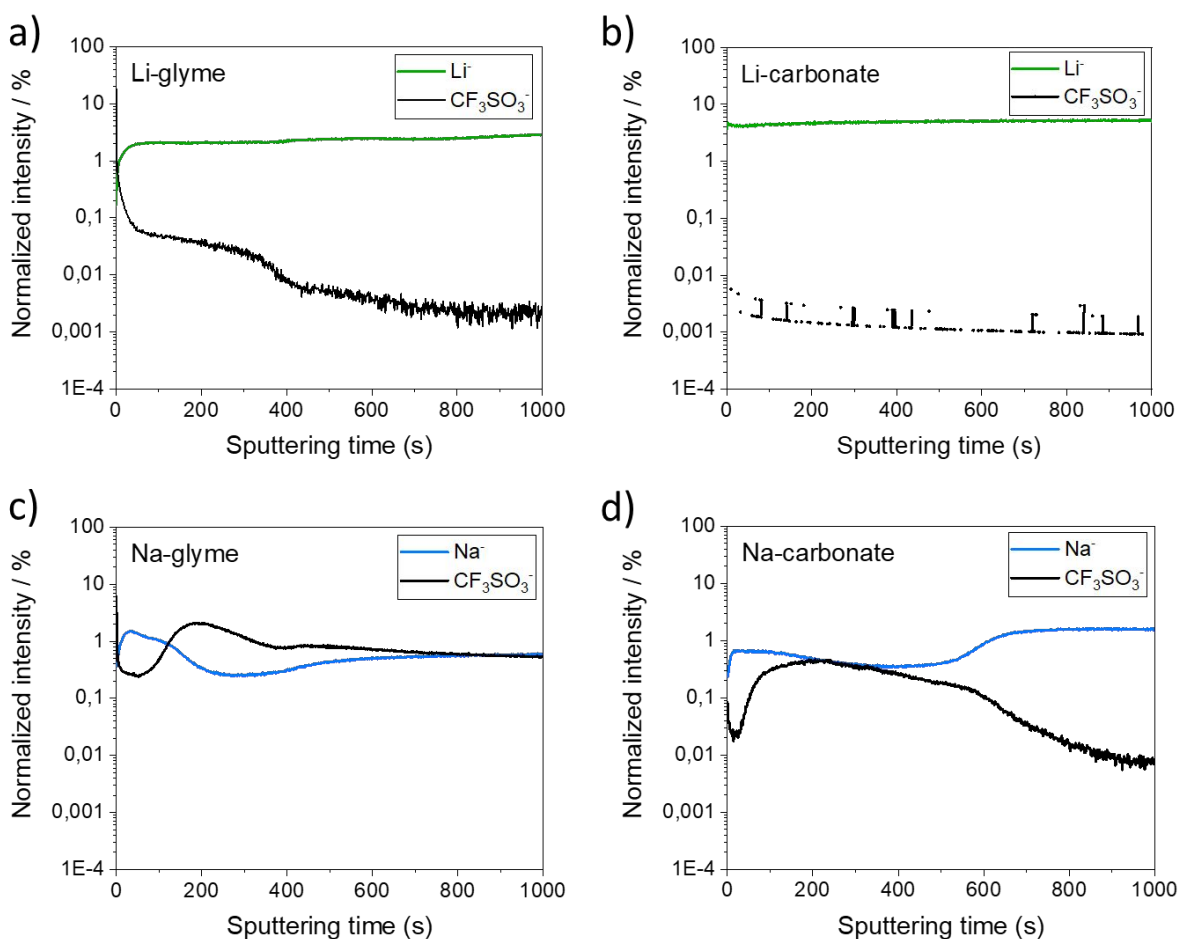

**Figure S7.** ToF-SIMS depth profiles of SEIs formed by contacting Li/Na with liquid electrolytes for 600 hours. (a) Li contacted with 1M LiTf in triglyme, (b) Li contacted with 1M LiTf in EC/DMC, (c) Na contacted with 1M NaTf in triglyme and (d) Na contacted with 1M NaTf in EC/DMC. Number of counts (y axis) were normalized by total intensity.



## VIII. XPS results of SEIs on Li contacted with glyme-/carbonate-based electrolytes

XPS was performed on a Kratos Axis Ultra system with a monochromatic Al  $K\alpha$  X-ray source. High-resolution data was acquired with a pass energy of 20 eV.  $Ar^+$  sputtering was performed using a scanned Minibeam III sputter gun (Kratos) with a beam energy of 4 kV and an emission current of 20 mA. XPS data was analysed with CasaXPS software (version 2.3.23PR1.0 by Casa Software Ltd).

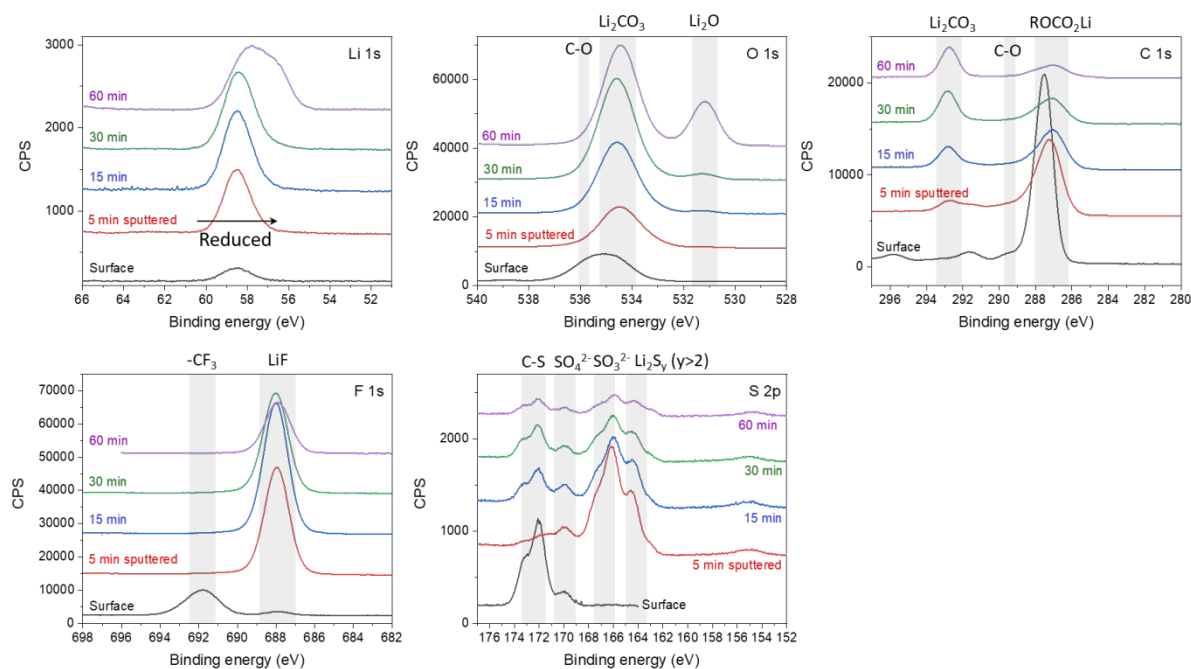

**Figure S8-1.** SEI on Li formed by contacting with 1M LiTf in triglyme for 2 hours

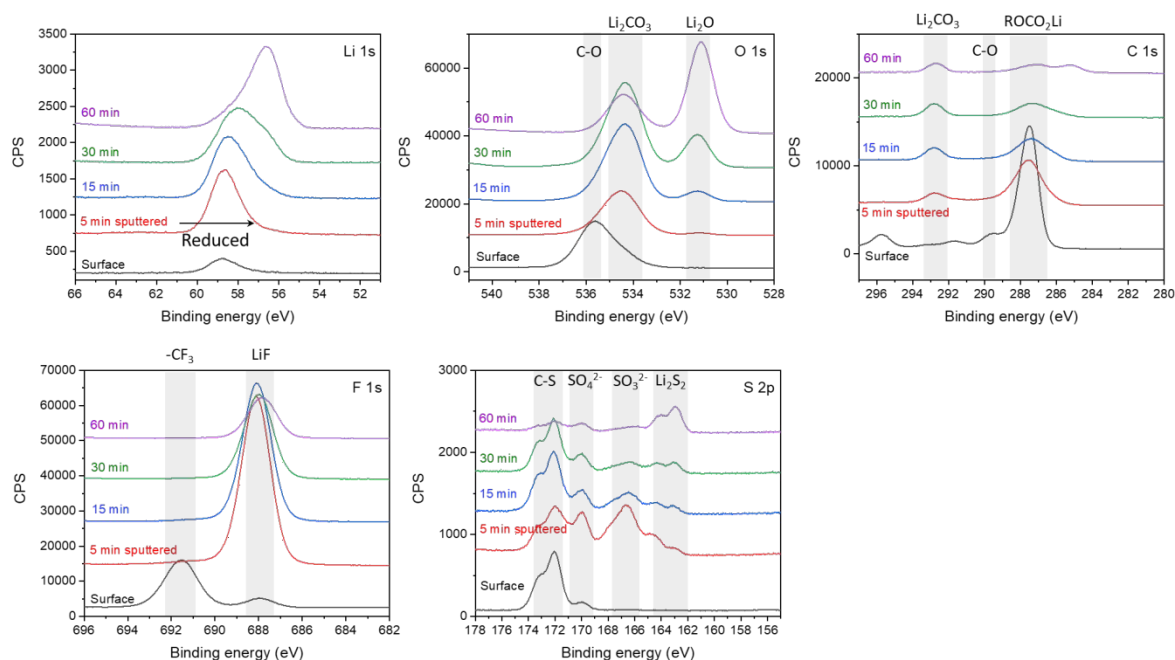

**Figure S8-2.** SEI on Li formed by contacting with 1M LiTf in triglyme for 600 hours

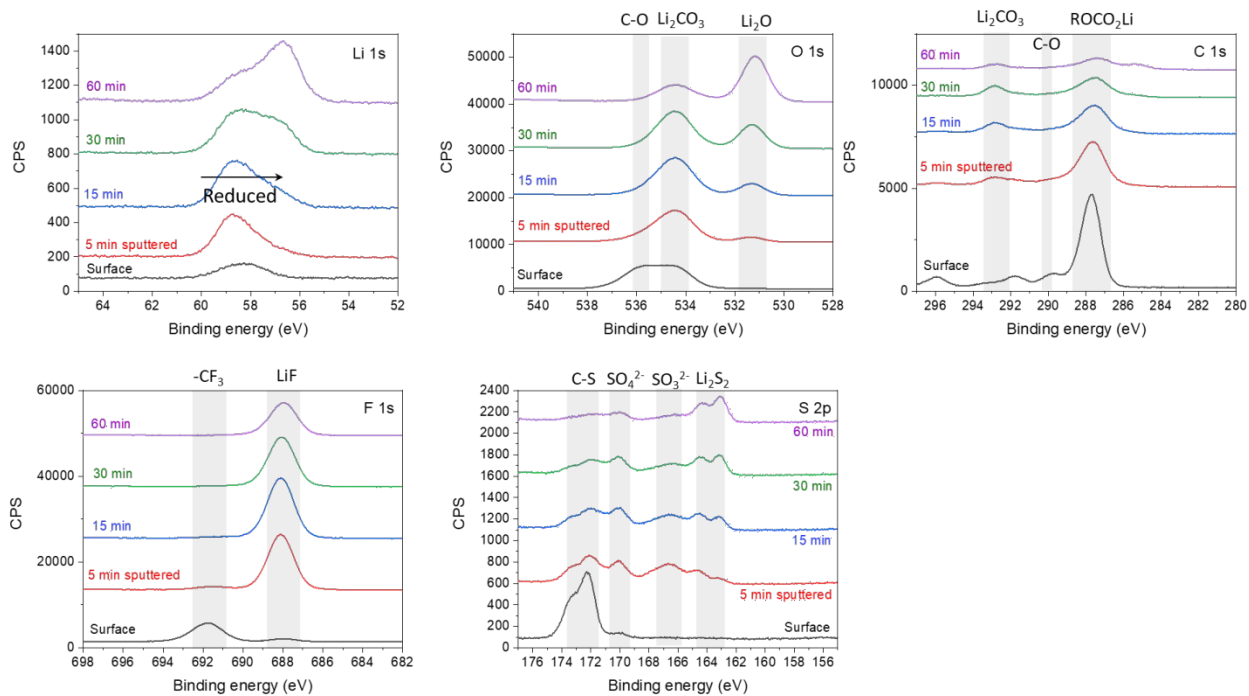

**Figure S8-3.** SEI on Li formed by contacting with 1M LiTf in EC/DMC for 2 hours.

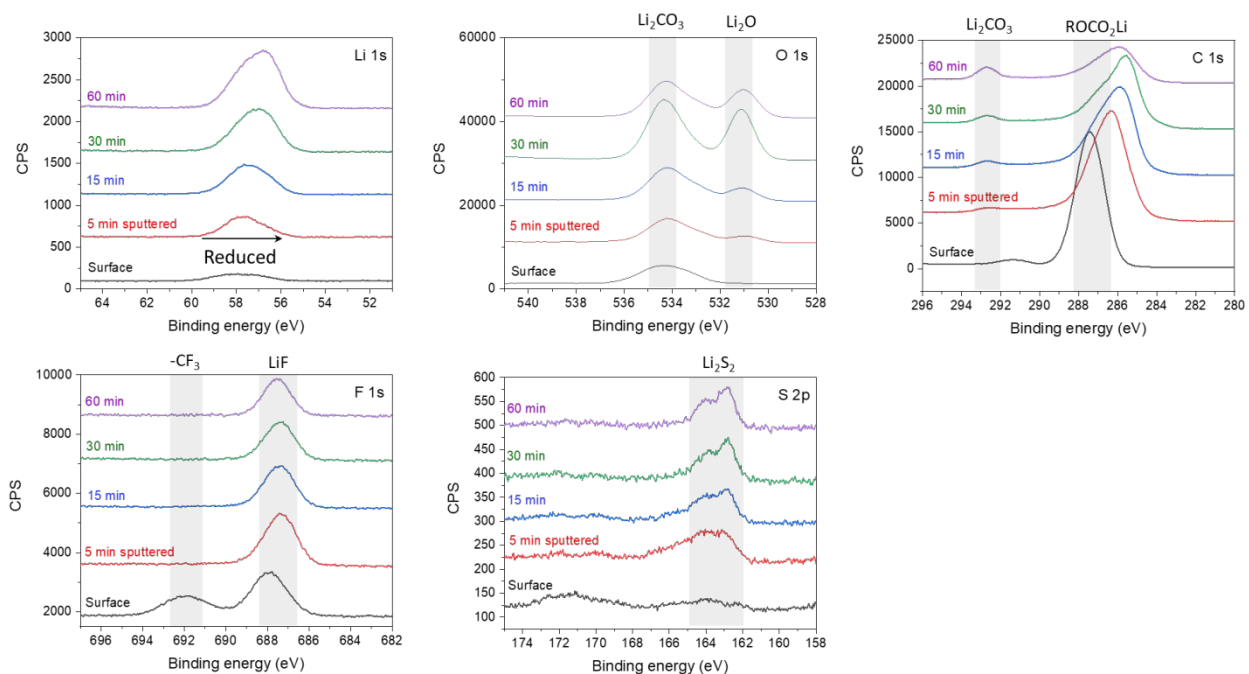

**Figure S8-4.** SEI on Li formed by contacting with 1M LiTf in EC/DMC for 600 hours.

## IX. Determination of cation transference number ( $t_{Li/Na}$ ) and salt diffusion coefficient ( $D_{salt}$ )

by galvanostatic polarization method

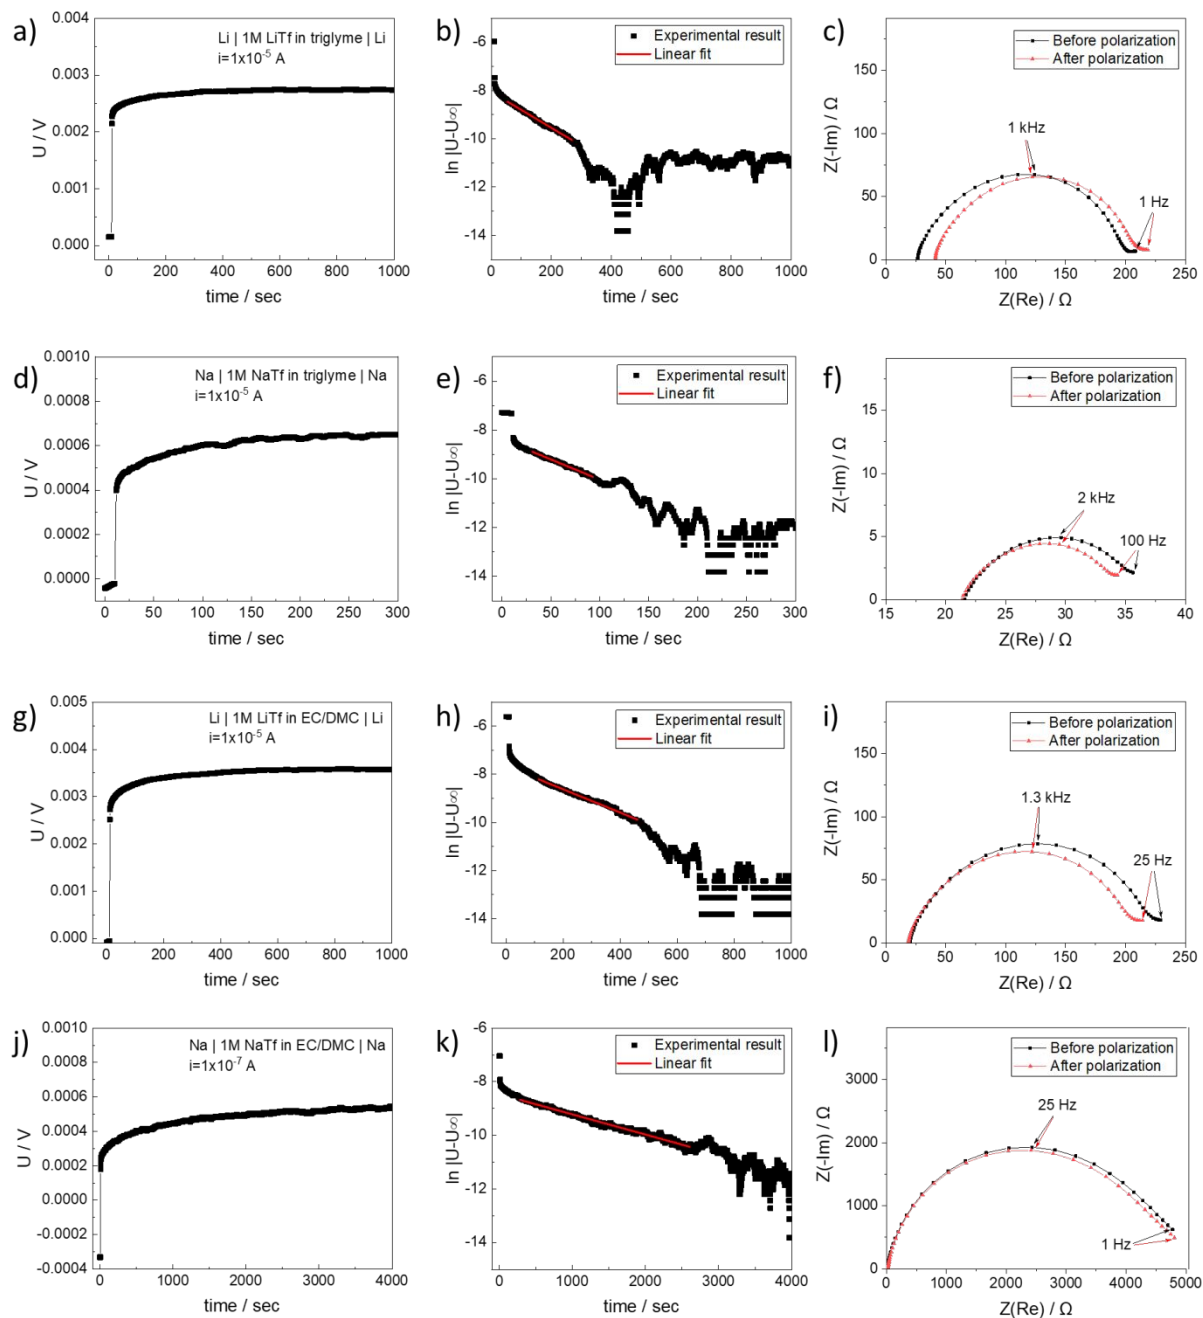

**Figure S9.** Determination of the cation transference number and salt diffusion coefficient by galvanostatic polarization method in (a-c) Li-glyme, (d-f) Na-glyme, (g-i) Li-carbonate and (j-l) Na-carbonate systems. (a, d, g, j) Time-dependent galvanostatic polarization curve. (b, e, h, k) Time vs.  $\ln|U-U_{\infty}|$  curve derived from (a, d, g, j), respectively. (c, f, i, l) Nyquist plots corresponding to EIS measurements before/after galvanostatic polarization.

The cation transference number was derived from<sup>1</sup>

$$t_{pol} = \frac{I_0(R_{tot,0} - R_{SEI,0})}{U_\infty - I_0 R_{SEI,\infty}} \quad (1)$$

where  $t_{pol}$  is transference number measured by polarization method,  $I_0$  is applied current,  $R_{tot,0}$  is total resistance before polarization,  $R_{SEI,0}$  is SEI resistance before polarization,  $U_\infty$  is steady-state voltage,  $R_{SEI,\infty}$  is SEI resistance after polarization.

Salt diffusion coefficient ( $D_{salt}$ ) was determined by the slope of time vs.  $\ln|U-U_\infty|$  curve (Fig. S8b, e, h, k) yielded by exponential law:

$$\ln [U(t) - U(t = \infty)] = const \pm t/\tau^* \quad (\tau^* = L^2/\pi D_{salt}) \quad (2)$$

where  $L$  is diffusion length, equivalent to the distance between two electrodes.  $L$  was estimated by

$$L = \sigma_{bulk} R_{bulk} A \quad (3)$$

where  $\sigma_{bulk}$  is ionic conductivity of electrolyte,  $R_{bulk}$  is electrolyte resistance measured from EIS and  $A$  is electrode surface area.

## X. $t_{Na}$ determination by Sørensen and Jacobsen method

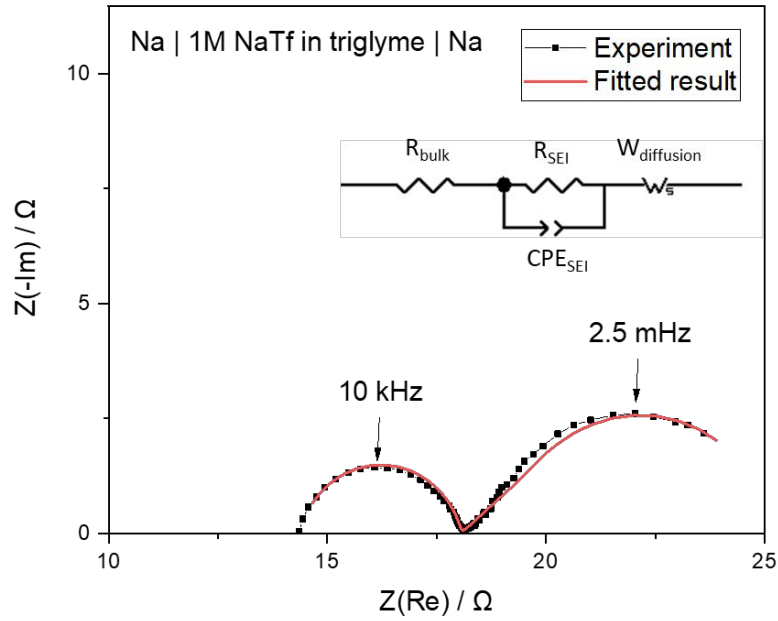

**Figure S10.** Impedance spectra of Na-glyme system measured in the frequency range of  $10^6$ - $10^3$  Hz. Transference number was derived from the method suggested by Sørensen and Jacobsen.<sup>2</sup>

Transference number was calculated from

$$t_+ = \frac{1}{1 + \frac{Z_d(0)}{R_{bulk}}} = 0.364 \quad (4)$$

where  $Z_d(0)$  is a diameter of low frequency arc and  $R_{bulk}$  is bulk electrolyte resistance.

**XI. Top-view SEM images of Li/Na electrodes after stripping/plating with glyme-/carbonate-based electrolyte stored for 0 hour vs. 600 hours**

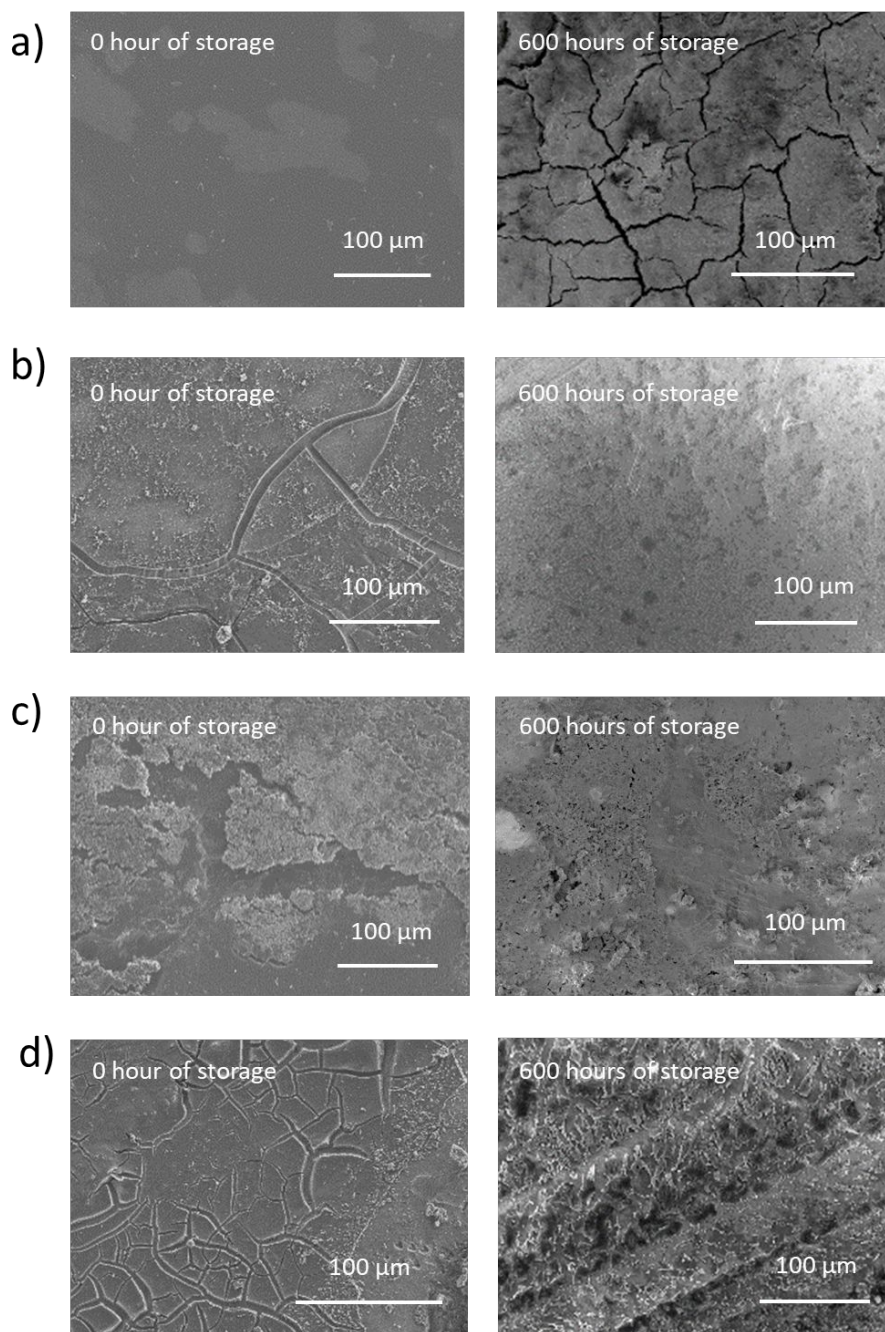

**Figure S11.** Top-view images of electrodes after stripping-plating in (a) Li-glyme, (b) Na-glyme, (c) Li-carbonate and (d) Na-carbonate systems.

**XII. Comparison of Pilling-Bedworth ratio ( $R_{PB}$ ) of Li SEI compounds vs. Na SEI compounds**

**Table S2.** Comparison of Piling-Bedworth ratio ( $R_{PB}$ ) of inorganic Li/Na SEI compounds.

| Li SEI compounds                |          | Na SEI compounds                |          |
|---------------------------------|----------|---------------------------------|----------|
| Compound name                   | $R_{PB}$ | Compound name                   | $R_{PB}$ |
| LiF                             | 0.76     | NaF                             | 0.69     |
| Li <sub>2</sub> O               | 0.57     | Na <sub>2</sub> O               | 0.58     |
| Li <sub>2</sub> O <sub>2</sub>  | 0.76     | Na <sub>2</sub> O <sub>2</sub>  | 0.59     |
| Li <sub>2</sub> CO <sub>3</sub> | 1.35     | Na <sub>2</sub> CO <sub>3</sub> | 0.88     |
| LiOH                            | 1.26     | NaOH                            | 0.79     |
| Li <sub>2</sub> S               | 1.06     | Na <sub>2</sub> S               | 0.89     |
| LiH                             | 0.75     | NaH                             | 0.72     |

Pilling-Bedworth ratio ( $R_{PB}$ ) is the ratio of molar volume of the Li compounds to the molar volume of the metallic Li.  $R_{PB}$  was calculated from

$$R_{PB} = \frac{V_{Li\ compound}}{n \times V_{Li}} \quad (5)$$

where  $V_{Li\ compound}$  is the molar volume of lithium compound,  $n$  is number of reacted Li and  $V_{Li}$  is molar volume of metallic Li. Same equation was applied for Na.

## References

- (1) Evans, J.; Vincent, C. A.; Bruce, P. G. Electrochemical measurement of transference numbers in polymer electrolytes. *Polymer* **1987**, *28* (13), 2324-2328, DOI: [https://doi.org/10.1016/0032-3861\(87\)90394-6](https://doi.org/10.1016/0032-3861(87)90394-6).
- (2) Ravn Sørensen, P.; Jacobsen, T. Conductivity, charge transfer and transport number—an ac-investigation of the polymer electrolyte LiSCN-poly(ethyleneoxide). *Electrochimica Acta* **1982**, *27* (12), 1671-1675, DOI: [https://doi.org/10.1016/0013-4686\(82\)80162-X](https://doi.org/10.1016/0013-4686(82)80162-X).
